# Supplementary material for: Kinetic-catalytic method for sequential determination of iron and copper using a chip coupled to a multipumping flow system
Source: Royal Society of Chemistry journal article supplement (doi:10.1039/c5ay00799b), 2015-01-01
Supplement: c5ay00799b1.pdf [file c5ay00799b1.pdf]

**Supplementary material**

**TableS1**

| Design                                       | Screening: Full Factorial (2 <sup>4</sup> )   |                                                                | Doerlert matrix 1 | Doerlert matrix 2 |                |
|----------------------------------------------|-----------------------------------------------|----------------------------------------------------------------|-------------------|-------------------|----------------|
| Experimental Domain and results              | Fe                                            | Cu                                                             | Cu                | Fe                | Cu             |
| T ( °C)                                      | 25-45                                         | 25-45                                                          | 32                | 25-40             | 25-40          |
| [Griess R.] ( %v.v)                          | 0.1-0.5                                       | 0.1-0.5                                                        | 0.3               | 0.3               | 0.3            |
| [NH <sub>2</sub> OH] ( mol L <sup>-1</sup> ) | 0.01-0.19                                     | 0.01-0.19                                                      | 0.1-0.3           | 0.1-0.3           | 0.1-0.3        |
| pH                                           | 12.2-12.8                                     | 12.2-12.8                                                      | 11.6-12.8         | 12.5              | 12.5           |
| Correlation coef.                            | 0.9559                                        | 0.9227                                                         | 0.9727            | 0.9989            | 0.9936         |
| Adjusted coef.                               | 0.8942                                        | 0.8261                                                         | 0.9272            | 0.9971            | 0.9830         |
| Pure error                                   | 0.00015                                       | 0.0002                                                         | 0.00007           | 0.000006          | 0.00004        |
| Factors with main effects                    | [NH <sub>2</sub> OH], T and their interaction | T, [NH <sub>2</sub> OH] and pH interaction, pH and [Griess R.] | pH                | T <sup>o</sup>    | T <sup>o</sup> |
